# Supplementary material for: Novel Victorivirus from a Pakistani Isolate of Alternaria alternata Lacking a Typical Translational Stop/Restart Sequence Signature
Source: PubMed Central journal article supplement (PMC6631646; doi:10.3390/v11060577), 2019-06-25

## **Supplemental Materials**

### **Novel Victorivirus from a Pakistani Isolate of *Alternaria alternata* Lacking a Typical Translational Stop/Restart Sequence Signature**

Atif Jamal<sup>1,2,†</sup>, Yukiyo Sato, Sabitree Shahi, Wajeeha Shamsi<sup>1</sup>, Hideki Kondo<sup>2</sup>, and Nobuhiro Suzuki<sup>1\*</sup>

<sup>1</sup>Institute of Plant Science and Resources, Okayama University, Kurashiki, Okayama 710-0046, and

<sup>2</sup>Crop Diseases Research Institute, National Agricultural Research Centre, Park Road, Islamabad, 45500 Pakistan.

†Correspondence may be sent to:

Dr. Atif Jamal

Crop Diseases Research Institute

National Agricultural Research Centre

Park Road, Islamabad, 45500 Pakistan

Telephone: +923018544434

E-mail: [atif75j@gmail.com](mailto:atif75j@gmail.com)

or Dr. Nobuhiro Suzuki

IPSR, Okayama University

Chuou 2-20-1, Kurashiki, JAPAN

Telephone: 81-86-434-1230

FAX: 81-86-434-1232

E-mail: [nsuzuki@okayama-u.ac.jp](mailto:nsuzuki@okayama-u.ac.jp)

**Supplementary Table S1**

**Supplementary Figures S1 to S4**

## Supplementary Table S1 Primer list

**Figure S1. Multiple alignments of victorivirus nucleotide and amino acid sequences.** **A.** Presence of Octanucleotide sequence along with an extra seven conserved nucleotides (5'-AGGGUCCGUUGAUC-3', bold letters) in the 5'UTR of AalVV1 and several other victoriviruses. The numbers in the parenthesis indicate the start of Octanucleotide sequence in the 5'UTR of the respective viruses. **B.** Comparison of the eight conserved motifs of RNA-dependent RNA polymerase of AalVV1 with those of other victoriviruses **C.** Comparison of C-terminal region of AalVV1 with prototype victorivirus HVv190S showing a Ala/Gly/Pro-rich region.

**Figure S2. The Mascot search result of the LC-MS/MS analysis of the major 80 kDa protein band of AalVV1.** The peptides predicted by LC-MS/MS analysis were mapped onto the deduced amino acid sequence of AalVV1 under the assumption that ribosomes were slipped on repeated A sequences followed with the stop codon of the ORF1. The light cyan and the light magenta indicate the amino acid sequence of frame +3 and frame +1, respectively, on the positive strands of AalVV1 genome.

**Figure S3. Colony morphology of *Cryphonectria parasitica* infected AalVV1.** Protoplasts of two strains of *C. parasitica*, the standard RNA silencing-proficient EP155 and RNA silencing-deficient strain Ddcl2, were transfected by partially purified virions of AalVV1. Obtained transfectants and virus-free counterparts were grown on PDA for one week, and photographed.

**Figure S4. Predicted secondary structure of the ORF1/ORF2 junction sequences of the two AalVV1 related victoriviruses.** Pseudoknot structures were predicted by DotKnot program [Sperschneider and Datta, 2010] and schematically represented for Phomopsis vexans RNA virus (PvRV, accession number KP090346) and Nigrosopra oryzae victorivirus 1 (NoVV1, accession number KT428155). The ORF1 termination codon and the ORF2 AUG codon are denoted in blue and red, while the upstream in-frame ORF2 stop codons are shown in bold. PvRV could utilize the -2/+1 frameshift and the possible slippery site (blue bracket) is shown. A predicted RNA pseudoknot structure is depicted near the 3' end of the ORF1, and the nucleotide positions are indicated (2511–2538), whereas NoVV1 could utilize the termination-reinitiation strategy and the position of overlapping start codon of the ORF2 and the stop codon of the ORF1 in the tetranucleotide sequence AUGA (map position 2554, highlighted red/blue) as indicated.

Sperschneider, J.; Datta, A., DotKnot: pseudoknot prediction using the probability dot plot under a refined energy model. *Nucleic Acids Res* **2010**, 38, (7), e103.

**Table S1.** List of primers used in the confirmation and completion of the AalVV1 sequence.

| Primer name                                  | Oligonucleotide sequence (5'-3') | Position  | Usage                  |
|----------------------------------------------|----------------------------------|-----------|------------------------|
| AJ- 19F (1)                                  | CCGATGGCCGATGAGAACAGG            | 2244-2264 | RT-PCR                 |
| AJ- 19R (1)                                  | TCTCCAGCAATCCCGCGCTAC            | 2973-2953 | RT-PCR                 |
| AJ- 19F (2)                                  | CGCATCCCTTCAAGTTCCGGG            | 2035-2055 | RT-PCR                 |
| AJ- 19R (2)                                  | AGATCGTAGGGAGTCAACCGC            | 2645-2625 | RT-PCR                 |
| AJ- 19 (E1)                                  | GTAGCGTCGGTATTGGTCGTC            | 374-353   | RLM-RACE               |
| AJ- 19 (E1)                                  | GCACCGTCGGGTGTGCTCACC            | 4812-4792 | RLM-RACE               |
| AJ- 19 (E2)                                  | TGAGTGTAGGCCATCGCCTCG            | 493-473   | RLM-RACE               |
| A2- 19 (E2)                                  | GATGGTCATGTCTAGTTGGTC            | 4662-4681 | RLM-RACE               |
| LIG-For primer                               | CCGCTCTAGAACTAGTTGGATC           |           | RLM-RACE               |
| LIG-Rev [5'-phosphorylated; 3'-amino-linked] | GATCCAAGTCTAGAGCGG               |           | RLM-RACE               |
| ITS1                                         | TCCGTAGGTGAACCTGCGG              |           | For rDNA amplification |
| ITS2                                         | TCCTCCGCTTATTGATATGC             |           | For rDNA amplification |

**Table S2. Some properties of reported victoriviruses**

| SNo | Virus name                               | Abbreviations | Accession | Genome length (nt) | CP coding region | RdRp coding region | Host     | Conserved octanucleotide sequence in 5'UTR | Reference                        |
|-----|------------------------------------------|---------------|-----------|--------------------|------------------|--------------------|----------|--------------------------------------------|----------------------------------|
| 1   | Aspergillus foetidus slow virus 1        | AfSV1         | NC_038928 | 5194               | 374-2599         | 2599-5188          | Fungi    | AGGGTCCGTTGATC                             | Kozlakidis <i>et al.</i> , 2013  |
| 2   | Beauveria bassiana victorivirus 1        | BbVV-1        | NC_038929 | 5288               | 444-2672         | 2672-5176          | Fungi    | AGGGTCCGTTGATC                             | Herrero <i>et al.</i> , 2012     |
| 3   | Beauveria bassiana victorivirus NZL/1980 | BbVV-NZL/1980 | NC_024151 | 5327               | 459-2735         | 2735-5266          | Fungi    | AGGGTCCGTTGATC                             | Khalifa. (unpublished)           |
| 4   | Botryosphaeria dothidea victorivirus 1   | BdV1          | NC_025214 | 5322               | 512-2743         | 2743-5265          | Fungi    | -----                                      | Zhai <i>et al.</i> (unpublished) |
| 5   | Chalara elegans RNA Virus 1              | CeRV1         | NC_005883 | 5310               | 329-2641         | 2619-4067          | Fungi    | -----                                      | Park <i>et al.</i> , 2005        |
| 6   | Coniothyrium minitans RNA virus          | CmRV          | NC_007523 | 4975               | 62-2389          | 2386-4875          | Fungi    | AGGGTCCGTTGATC (start of UTR)              | Cheng <i>et al.</i> , 2003       |
| 7   | Eimeria tenella RNA virus 1              | EtV 1         | NC_026140 | 6006               | 350-2716         | 2713-5928          | Protozoa | -----                                      | Wu <i>et al.</i> , 2016          |
| 8   | Epichloe festucae virus 1                | EfV1          | NC_038930 | 5109               | 271-2571         | 2568-5051          | Fungi    | AGGGTTCC                                   | Romo <i>et al.</i> , 2007        |
| 9   | Fusarium poae victorivirus 1             | FpV 1         | NC_030867 | 5124               | 164-2572         | 2572-5055          | Fungi    | AGGGTTCC (in ORF1)                         | Osaki <i>et al.</i> , 2016       |
| 10  | Gremmeniella abietina RNA virus L1       | GaRV-L1       | NC_003876 | 5133               | 276-2603         | 2603-5080          | Fungi    | AGGGTTCC                                   | Tuomivirta and Hantula, 2003     |
| 11  | Helicobasidium mompatotivirus 1-17       | HmTV1-1-17    | NC_005074 | 5207               | 200-2566         | 2563-5100          | Fungi    | -----                                      | Nomura <i>et al.</i> , 2003      |
| 12  | Helminthosporium victoriae virus 190S    | HvV190S       | NC_003607 | 5179               | 290-2608         | 2605-5112          | Fungi    | -----                                      | Huang and Ghabrial, 1996         |
| 13  | Magnaporthe oryzae virus 1               | MoV1          | NC_006367 | 5359               | 575-2815         | 2818-5316          | Fungi    | -----                                      | Yokoi <i>et al.</i> , 2007       |
| 14  | Magnaporthe oryzae virus 2               | MoV2          | NC_010246 | 5139               | 275-2641         | 2638-5130          | Fungi    | AGGGTTCC                                   | Maejima <i>et al.</i> , 2008     |
| 15  | Magnaporthe oryzae virus 3               | MoV3          | NC_027209 | 5181               | 283-2634         | 2631-5108          | Fungi    | AGGGTTCC                                   | Tang <i>et al.</i> , 2015        |
| 16  | Nigrospora oryzae victorivirus 1         | NoRV1         | NC_030224 | 5100               | 236-2554         | 2554-5037          | Fungi    | AGGGTCCGTTGATC                             | Zhong <i>et al.</i> , 2016       |
| 17  | Phomopsis vexans RNA virus               | PvRV1         | NC_026135 | 5076               | 243-2543         | 2642-5026          | Fungi    | AGGGTCCGTTGATC                             | Zhang <i>et al.</i> , 2015       |
| 18  | Rosellinia necatrix victorivirus 1       | RnVV1         | NC_021565 | 5329               | 373-2664         | 2664-5192          | Fungi    | -----                                      | Chiba <i>et al.</i> , 2013       |
| 19  | Sclerotinia nivalis victorivirus 1       | SnVV1         | NC_030392 | 5162               | 286-2583         | 2580-5081          | Fungi    | AGGGTTCC                                   | Wu and Li. (unpublished)         |
| 20  | Sphaeropsis sapinea RNA virus 1          | SsRV1         | NC_001963 | 5163               | 80-2581          | 2574-5090          | Fungi    | AGGGTCCGTTGATC (in ORF1)                   | Preisig <i>et al.</i> , 1998     |
| 21  | Sphaeropsis sapinea RNA virus 2          | SsRV2         | NC_001964 | 5202               | 296-2665         | 2658-5135          | Fungi    | AGGGTTCC                                   | Preisig <i>et al.</i> , 1998     |
| 22  | Tolypocladium cylindrosporium            | TcV1          | NC_014823 | 5196               | 327-2603         | 2604-5126          | Fungi    | -----                                      | Herrero and                      |

|    |                                        |       |           |       |          |           |       |                 |  |                                   |
|----|----------------------------------------|-------|-----------|-------|----------|-----------|-------|-----------------|--|-----------------------------------|
|    | virus 1                                |       |           |       |          |           |       |                 |  | Zabalgogea, 2011                  |
| 23 | Ustilaginoidea virens RNA virus 1      | UvRV1 | NC_020997 | 5142  | 274-2604 | 2904-5075 | Fungi | -----           |  | Zhong <i>et al.</i> , 2014        |
| 24 | Ustilaginoidea virens RNA virus 3      | UvRV3 | NC_023547 | 5075  | 259-2532 | 2532-5021 | Fungi | AGGGTTCCGTTGATC |  | Zhong <i>et al.</i> , 2014        |
| 25 | Ustilaginoidea virens RNA virus 5      | UvRV5 | NC_028477 | 5221  | 314-2584 | 2584-5166 | Fungi | AGGGTTCCGTTGATC |  | Zhong <i>et al.</i> (unpublished) |
| 26 | Ustilaginoidea virens RNA virus L      | UvRVL | NC_025366 | 5654  | 421-2661 | 2661-5144 | Fungi | AGGGTTCC        |  | Jiang <i>et al.</i> , 2015        |
| 27 | Alternaria arborescens victorivirus 1  | AaVV1 | NC_040793 | 5206  | 327-2657 | 2654-5143 | Fungi | AGGGTTCCGTTGATC |  | Komatsu <i>et al.</i> , 2016      |
| 28 | Botryosphaeria dothidea victorivirus 2 | BdVV2 | MH301088  | 5,090 | 284-2505 | 2512-5019 | Fungi | AGGGTTCCGTTGATC |  | Yang <i>et al.</i> , 2019         |
| 29 | Fusarium asiaticum victorivirus 1      | FaVV1 | NC_040653 | 5281  | 378-2657 | 2657-5185 | Fungi | -----           |  | Li <i>et al.</i> , 2019           |
| 30 | Nigrospora oryzae victorivirus 2       | NoRV2 | MH823900  | 5166  | 327-2597 | 2597-5095 | Fungi | -----           |  | Liu <i>et al.</i> , 2019          |
| 31 | Ustilaginoidea virens RNA virus M      | UvRVM | NC_025367 | 2714  | 731-2239 |           | Fungi | -----           |  | Jiang <i>et al.</i> , 2014        |

# Figure S1

**A**

```

EfV1 [215] GAGGAGGGUUCU AAGAUCCCAAACUUACGAAUAUC-----CCAAC
GaRV-L1 [215] GGCGAGGGUUCG AAGACCCCU-AAA-----CUACA---ACAAU
MoV2 [207] GAGGAGGGUUCG UUGAUACCA-ACG-AUUUAACAACUAGUAAC---ACGAU
MoV3 [216] AAGGAGGGUUCG AAGAUCUCU-ACAUAGAAACGAUUGUUACA---GUAAC
SnVV1 [194] GAGUAGGGUUCG UUGAUCCACACUUGUAGAUAGACGAAAUAC-AGUAAC
SsRV2 [229] GAGGAGGGUUCG AAGAUCCAA-ACC-AUUACACACCUGCAACU---CUGAU
UvRVL [332] GAGGAGGGUUCG UUGAUCCUG-GCCUACCAGUUCUAACGUACUAGUGCU
.. ***** ** . . .
  
```

```

Aa1VV1 [204] -----CUGGGUCCG UAGAGGAGGGUUCG GUUGAUCCUACUACCAG-
AfsV1 [300] -----AGGGAGGGUUCG GUUGAUCUCAGCCUAGAC
BbVV-1 [352] UGGCUUCACAGGAGAU AAGUGACUUGGGGAGGGUUCG GUUGAUCCAAGCCA----
BbVV-NZL/ [382] UAGAAUCGGCCGUUCUGUAUGUGGGGAGGGUUCG GUUGAUCCCACCUCGCU
CmRV [1] -----AGGGUUCG GUUGAUCCACCUCUCA
NoRV1 [172] -----UUGUUCGCGGGGAGGGUUCG GUUGAUCCGACCUUCAAC
PvRV1 [182] -----GCGGGGAGGGUUCG GUUGAUCCGACCUGCACC
UvRV3 [196] -----AAGUAUGUUUCGGGAGUAGGGUUCG GUUGAUCCCGU-----
UvRV5 [168] -----CACAGCGGAGGAGGAGGGUUCG GUUGAUCCUCGAGUUUGU
*****
  
```

**C**

```

HVv190S [696] LRAPPFPRQQGAL-GGGGNVPLPPAPGAAPPPPPGPPNGPPAGPPPSDDGSSNPAAVPVPTA
Aa1Vv1 [704] LRGAPLPRVGGGQLGGAVNPPPPQGLVPPPPSTGPNPPNSEGPPSDNAEAAGALAAPQN
** . *:** * . ** * * * * * .**** ** * : *****:..: * .*
  
```

**B**

|               | <u>Motif I</u>     | <u>Motif II</u>    | <u>Motif III</u>        |
|---------------|--------------------|--------------------|-------------------------|
| Aa1VV1 [103]  | GSLLVETDTLQGR [63] | SRWNWSVNGSHSA [46] | KLECGKTRAIYACDTRSY [46] |
| NoVv1 [211]   | GALLVETDTLLGR [64] | SRWSWAVNGSHSA [46] | KPECCKIRAIYACDTINY [46] |
| PvRV [178]    | GALLVETDTLQGR [64] | SRWSWAVNGSHSS [46] | KLECGKTRAIYACDTRSY [46] |
| UvRV3 [212]   | GAMMVEVDTLAGR [65] | SRWRWAVNGSHSA [46] | KLEHGKTRTILACDTRSY [46] |
| UvRV6 [213]   | GAMMVEVDTLAGR [65] | SRWRWAVNGSHSA [46] | KLEHGKTRTILACDTRSY [46] |
| FpV1 [211]    | GSLLVECEVLQGR [64] | SRWVWAVNGSQSS [46] | KLENGKTRAIACDTRHY [46]  |
| HVv190S [232] | GALFVEANTLQGR [58] | SRWLWCVNGSQNA [42] | KLENGKDRAIFACDTRSY [46] |
|               | *:::** :.* **      | *** *.****:..      | * * * * * * * * * *     |

|         | <u>Motif IV</u>    | <u>Motif V</u>                                  | <u>Motif VI</u> |
|---------|--------------------|-------------------------------------------------|-----------------|
| Aa1VV1  | MLDYDDFNSSHHT [45] | GTLMSGHRGTTYFN SVLN MAYLMCVLGEDYILARPSLHVGGDDVY |                 |
| NoVv1   | MLDYDDFNSSHHT [45] | GTLMSGHRCTTYVNSVLN MAYLMVVLGEDVWMERQSLHVGGDDVY  |                 |
| PvRV    | MLDYDDFNSSHHT [45] | GTLMSGHRCTTYINSVLN MAYLMVVLGEDVFLERQSLHVGGDDVY  |                 |
| UvRV3   | MLDYDDFNSSHHT [45] | GTLMSGHRCTTYINSVLN MAYLMVVLGEDVFMERPTLHVGGDDVY  |                 |
| UvRV6   | MLDYDDFNSSHHT [45] | GTLMSGHRCTTYINSVLN MAYLMVVLGEDVFMERPTLHVGGDDVY  |                 |
| FpV1    | MLDYDDFNSSHHT [45] | GTLMSGHRATTFINSVLN KAYLDVVLGEGWLDTRRSVHVGGDDIY  |                 |
| HVv190S | MLDYDDFNSSHHT [44] | GTLMSGHRATTFINSVLN AAYICYAVGIPAFKRMISLHVGGDDVY  |                 |
|         | **** :***:*        | ***** ** : **** ** : .:* . :*:****:             |                 |

|              | <u>Motif VII</u>                               | <u>Motif VIII</u>   |
|--------------|------------------------------------------------|---------------------|
| Aa1VV1 [21]  | RMNPTKQSVGHVSTEF LRVASDARDSYGYLARAVATTVAGNWYT  | [250]               |
| NoVv1 [21]   | RMNRRKQSVGHVSTEF LRVASDARDSYGYLARAAAANLIAGNWYS | [250]               |
| PvRV [21]    | RMNRSKQSVGHVSTEF LRVASDARDSYGYLARATANLIAGNWYS  | [250]               |
| UvRV3 [21]   | RMNRSKQSVGHVSTEF LRVSSRARDSYGYLCRAISSCVSGNWVS  | [250]               |
| UvRV6 [21]   | RMNRSKQSVGHVSTEF LRVSSQGRVSMGYLCRAIASVSGNWVT   | [250]               |
| FpV1 [21]    | RMNPTKQSVGHVSTEF LRLATAGRDTYGYVARSIASLISGNWVS  | [250]               |
| HVv190S [21] | RMNPTKQSIGYTGAEFLRLGINKSYAIGYLCRAIASLVSGSWTS   | [248]               |
|              | *** **:*:..:*. :*                              | : **:*: . . :*:.* : |

# Figure S2

## Mascot Search Results

### Protein View

Match to: AalVv1\_frameshift Score: 2456

Found in search of AalVv1\_80kDa.mgf

Nominal mass (M<sub>r</sub>): 171617; Calculated pI value: 6.96

NCBI BLAST search of AalVv1\_frameshift against nr

Unformatted sequence string for pasting into other applications

Fixed modifications: Carbamidomethyl (C)

Cleavage by Trypsin: cuts C-term side of KR unless next residue is P

Sequence Coverage: 36%

Matched peptides shown in Bold Red

```

1 MASTVNFQIA ANAMLTGTLG GVSQGLLQAD DQYRRYRAGL SVGSFHEGSY
51 THSRRSIFYE VGRRYGRIVE AMAYTHGNED AVEIDASVPI NPAQANFEG
101 WARRFSNFSF QVWMDLAGV AERLAKGVAA QSVYGVVSCG HLRGGAGIRI
151 VALGTLDSQP TASNNVFFIP RTVDVTGNDH VFAVLAALAN GEGATVTTDV
201 VRLDAATNQF IVPNVGDYAF ATACVEALRV LGANMEESGA GDMFYAVTR
251 GHSIVSVVVA HTDEGGWVLR VLRGSSFRVP YGGINQALRD YGPLPPLAGH
301 FTSAVASAMWD AIALKTAARV AHCDPCTIAT GGSYPTVFTS ATGAVSAPGT
351 DETDAGDADS RTIGRQISSD SGRFAPLFRV ALTGPIFLGNT ISGVAEAFHC
401 TAAQELLELS TDRHLRHKTV AYPFWIEPTS LIPRNFAGTE AERAGFGSIT
451 SVGLESEMPA FERVELDRG RANFSTIAP KMRTARTSGI ISAYAGKPAD
501 LSGFRLYQFD EDSIILPGDQ GPTAGTVAAK HAAADPITSY LWRRGQSPPI
551 APAEFINTQS MYAAKYKIVD WDDDFDFTLG DLPEAWELTF HFFKFRVTSF
601 TAIANGGNSA GDMNKRARS RAALIAQAQT IRNRLGLDAS SPVLSVSNVP
651 PTFDDTAPAP MADENRVEHH SDPGQTRFQG LGNDPSTAPS VRGPAALPLL
701 HQQLRGAFL PRVGGQLGG AVNPPPEPQG GLVPPPPSTG PNPNSGEPF
751 SNDAAGCAL AAEFGGPGV AKVAKTASDL DLYLKERLTP YDLGGLKELN
801 FSQISFVYR PAWGRRLRTP IARAAGYLL CRVPEQVALP ESALVHLTY
851 LPPVPLPPT ODIPRWLLDR KQNTAFPPK NRAMSITKAN MFLDEVARDC
901 WRVWPGLLQ QASPYLARLRD MKATHDQATA YLLYSVALSH HTIQAFRWAF
951 YALSNPKGAK EVSNFLKAVG GNASSFGSLT VETDTLQGRD TPGTNLAEDA
1001 KKRTNLGALK NDMLAEFFDD LRSASVRRVI DLELAHPGEE GYQFPTLADH
1051 WSSRWNVSNV GSHSALVGRE IGSLYPKPER ISKMHRRAWL ECVDEEPRVQ
1101 WDGHTVVSAN PKLECGKTRA IYACDTRSYL AFEHLLATVE RNWRGSRVIL
1151 NPGRGGHIGM AERVARNRNR CGISLMLDYD DFNSSHHTTRA MQVIEETS
1201 ATSYPPDLAA PLIASLGRQD IYLDGKQFVR SAGTILMSGHR GTTYFNSVLN
1251 MAYLMCVLGE DYILARPSLH VGDYVMGAT TYTEVGHIVE TMVASRLRNN
1301 PTKQSVGHVS TEFRLRVASDA RDSGYYLARA VATTAVGNWY TDRVLPNPPFA
1351 LTMVTVAART LANRARSNLV PLLLGSVAVR VLGPDSDDT MVDEILCCGL
1401 AINNGVPVFS GGLTRAVTVE PTIKSRDNGA YQELPCLSSN EFLSKCASPL
1451 ETTILSEAGI SVKQVMVSS WSKSVNFRDA DLLGLRFGTP TSHPAIGSVS
1501 AESLIKTRAP SGVLTKYPLL VLAKRGLPET ALRVAVAAAG GNPAPDIML
1551 EAWGEYKHGC IWNVLSYSYD AAALSVRTAC SVLTSTRRCY V
    
```

ORF1 on frame 3  
(stop codon and N ahead of it were removed)

Bridged sequence on frame 1

ORF2 on frame 1

Show predicted peptides also

Sort Peptides By  Residue Number  Increasing Mass  Decreasing Mass

| Start - End | Observed  | Mr (expt) | Mr (calc) | ppm | Miss | Sequence                                     |
|-------------|-----------|-----------|-----------|-----|------|----------------------------------------------|
| 55 - 63     | 563.8062  | 1125.5979 | 1125.5931 | 4   | 1    | R.RSIFYEVGR.R (Ions score 35)                |
| 55 - 63     | 563.8062  | 1125.5979 | 1125.5931 | 4   | 1    | R.RSIFYEVGR.R (Ions score 38)                |
| 56 - 63     | 485.7548  | 969.4950  | 969.4920  | 3   | 0    | R.SIFYEVGR.R (Ions score 31)                 |
| 56 - 63     | 485.7548  | 969.4950  | 969.4920  | 3   | 0    | R.SIFYEVGR.R (Ions score 25)                 |
| 56 - 63     | 485.7548  | 969.4950  | 969.4920  | 3   | 0    | R.SIFYEVGR.R (Ions score 22)                 |
| 56 - 63     | 485.7548  | 969.4950  | 969.4920  | 3   | 0    | R.SIFYEVGR.R (Ions score 10)                 |
| 56 - 64     | 563.8062  | 1125.5979 | 1125.5931 | 4   | 1    | R.SIFYEVGRR.Y (Ions score 20)                |
| 56 - 64     | 563.8062  | 1125.5979 | 1125.5931 | 4   | 1    | R.SIFYEVGRR.Y (Ions score 10)                |
| 104 - 123   | 781.0576  | 2340.1510 | 2340.1143 | 16  | 1    | R.RFSNFSQWVMDLAGVAER.L (Ions score 2)        |
| 105 - 123   | 728.9977  | 2183.9714 | 2184.0132 | -19 | 0    | R.RFSNFSQWVMDLAGVAER.L (Ions score 10)       |
| 127 - 143   | 859.4282  | 1716.8419 | 1716.8366 | 3   | 0    | K.GVAAGSVYGVVSCGHLR.G (Ions score 45)        |
| 150 - 171   | 1150.6072 | 2299.1998 | 2299.2172 | -8  | 0    | R.IVALGTLDSQPQTASNNVFFIPR.T (Ions score 93)  |
| 150 - 171   | 1150.6210 | 2299.2275 | 2299.2172 | 4   | 0    | R.IVALGTLDSQPQTASNNVFFIPR.T (Ions score 117) |
| 150 - 171   | 1150.6210 | 2299.2275 | 2299.2172 | 4   | 0    | R.IVALGTLDSQPQTASNNVFFIPR.T (Ions score 83)  |
| 230 - 250   | 1095.0037 | 2187.9929 | 2187.9929 | 0   | 0    | R.VLGNMEESGAGDMFYAVTR.P (Ions score 85)      |
| 279 - 289   | 594.3322  | 1186.6499 | 1186.6458 | 3   | 0    | R.VPYGGINQALR.D (Ions score 59)              |
| 279 - 289   | 594.3322  | 1186.6499 | 1186.6458 | 3   | 0    | R.VPYGGINQALR.D (Ions score 59)              |
| 279 - 289   | 594.3322  | 1186.6499 | 1186.6458 | 3   | 0    | R.VPYGGINQALR.D (Ions score 47)              |
| 279 - 289   | 594.3322  | 1186.6499 | 1186.6458 | 3   | 0    | R.VPYGGINQALR.D (Ions score 4)               |
| 366 - 373   | 425.2060  | 848.3975  | 848.3988  | -2  | 0    | R.QISSDSGR.F (Ions score 28)                 |
| 366 - 373   | 425.2060  | 848.3975  | 848.3988  | -2  | 0    | R.QISSDSGR.F (Ions score 31)                 |
| 374 - 380   | 425.2543  | 848.4941  | 848.4909  | 4   | 0    | R.FAPLFRV.A (Ions score 33)                  |
| 374 - 380   | 425.2543  | 848.4941  | 848.4909  | 4   | 0    | R.FAPLFRV.A (Ions score 28)                  |
| 374 - 380   | 425.2543  | 848.4941  | 848.4909  | 4   | 0    | R.FAPLFRV.A (Ions score 26)                  |
| 374 - 380   | 425.2543  | 848.4941  | 848.4909  | 4   | 0    | R.FAPLFRV.A (Ions score 26)                  |
| 419 - 434   | 945.5130  | 1889.0115 | 1889.0087 | 1   | 0    | K.TVAPYFWEIPTSILPR.N (Ions score 15)         |
| 419 - 434   | 945.5130  | 1889.0115 | 1889.0087 | 1   | 0    | K.TVAPYFWEIPTSILPR.N (Ions score 21)         |
| 419 - 434   | 945.5130  | 1889.0115 | 1889.0087 | 1   | 0    | K.TVAPYFWEIPTSILPR.N (Ions score 37)         |
| 419 - 434   | 630.6789  | 1889.0148 | 1889.0087 | 3   | 0    | K.TVAPYFWEIPTSILPR.N (Ions score 8)          |
| 419 - 434   | 630.6789  | 1889.0148 | 1889.0087 | 3   | 0    | K.TVAPYFWEIPTSILPR.N (Ions score 36)         |
| 419 - 434   | 630.6789  | 1889.0148 | 1889.0087 | 3   | 0    | K.TVAPYFWEIPTSILPR.N (Ions score 41)         |

|             |           |           |           |    |   |                                              |
|-------------|-----------|-----------|-----------|----|---|----------------------------------------------|
| 435 - 443   | 497.7345  | 993.4544  | 993.4516  | 3  | 0 | R.NAFGTEAER.A (Ions score 44)                |
| 435 - 443   | 497.7345  | 993.4544  | 993.4516  | 3  | 0 | R.NAFGTEAER.A (Ions score 46)                |
| 435 - 443   | 497.7345  | 993.4544  | 993.4516  | 3  | 0 | R.NAFGTEAER.A (Ions score 37)                |
| 435 - 443   | 497.7345  | 993.4544  | 993.4516  | 3  | 0 | R.NAFGTEAER.A (Ions score 37)                |
| 444 - 463   | 1043.0077 | 2084.0009 | 2083.9884 | 6  | 0 | R.AGFGSITSVGLESEMPAFER.V (Ions score 39)     |
| 444 - 463   | 1043.0077 | 2084.0009 | 2083.9884 | 6  | 0 | R.AGFGSITSVGLESEMPAFER.V (Ions score 71)     |
| 444 - 463   | 695.6770  | 2084.0092 | 2083.9884 | 10 | 0 | R.AGFGSITSVGLESEMPAFER.V (Ions score 27)     |
| 464 - 469   | 394.2262  | 786.4378  | 786.4348  | 4  | 1 | R.VRELDR.G (Ions score 13)                   |
| 464 - 469   | 394.2262  | 786.4378  | 786.4348  | 4  | 1 | R.VRELDR.G (Ions score 6)                    |
| 464 - 469   | 394.2262  | 786.4378  | 786.4348  | 4  | 1 | R.VRELDR.G (Ions score 5)                    |
| 464 - 469   | 394.2262  | 786.4378  | 786.4348  | 4  | 1 | R.VRELDR.G (Ions score 13)                   |
| 472 - 481   | 556.7924  | 1111.5703 | 1111.5662 | 4  | 0 | R.NANFSTIAFK.M (Ions score 55)               |
| 472 - 481   | 556.7924  | 1111.5703 | 1111.5662 | 4  | 0 | R.NANFSTIAFK.M (Ions score 52)               |
| 472 - 481   | 556.7924  | 1111.5703 | 1111.5662 | 4  | 0 | R.NANFSTIAFK.M (Ions score 51)               |
| 472 - 481   | 556.7924  | 1111.5703 | 1111.5662 | 4  | 0 | R.NANFSTIAFK.M (Ions score 52)               |
| 487 - 505   | 956.0062  | 1909.9979 | 1909.9898 | 4  | 0 | R.TSGLISAYAGKPADLSGFR.L (Ions score 37)      |
| 487 - 505   | 956.0062  | 1909.9979 | 1909.9898 | 4  | 0 | R.TSGLISAYAGKPADLSGFR.L (Ions score 47)      |
| 506 - 530   | 1303.6586 | 2605.3026 | 2605.2912 | 4  | 0 | R.LYQFDEDSIILPGDQGTAGTVAAK.H (Ions score 22) |
| 506 - 530   | 1303.6586 | 2605.3026 | 2605.2912 | 4  | 0 | R.LYQFDEDSIILPGDQGTAGTVAAK.H (Ions score 57) |
| 531 - 543   | 750.8861  | 1499.7577 | 1499.7521 | 4  | 0 | K.HAAADPITSYLWR.R (Ions score 20)            |
| 531 - 543   | 750.8861  | 1499.7577 | 1499.7521 | 4  | 0 | K.HAAADPITSYLWR.R (Ions score 44)            |
| 531 - 543   | 750.8861  | 1499.7577 | 1499.7521 | 4  | 0 | K.HAAADPITSYLWR.R (Ions score 49)            |
| 545 - 565   | 1111.0559 | 2220.0973 | 2220.0885 | 4  | 0 | R.GQSPIPAPAEFINTQSMYAAK.Y (Ions score 66)    |
| 545 - 565   | 1111.0559 | 2220.0973 | 2220.0885 | 4  | 0 | R.GQSPIPAPAEFINTQSMYAAK.Y (Ions score 52)    |
| 597 - 616   | 938.4505  | 1874.8865 | 1874.8792 | 4  | 0 | R.VTSPITAIANGGNSAGDNMAK.R (Ions score 20)    |
| 597 - 616   | 938.4505  | 1874.8865 | 1874.8792 | 4  | 0 | R.VTSPITAIANGGNSAGDNMAK.R (Ions score 106)   |
| 597 - 616   | 938.4505  | 1874.8865 | 1874.8792 | 4  | 0 | R.VTSPITAIANGGNSAGDNMAK.R (Ions score 86)    |
| 622 - 632   | 549.8369  | 1097.6592 | 1097.6557 | 3  | 0 | R.AIALAQATIR.N (Ions score 62)               |
| 622 - 632   | 549.8369  | 1097.6592 | 1097.6557 | 3  | 0 | R.AIALAQATIR.N (Ions score 63)               |
| 622 - 632   | 549.8369  | 1097.6592 | 1097.6557 | 3  | 0 | R.AIALAQATIR.N (Ions score 59)               |
| 622 - 632   | 549.8369  | 1097.6592 | 1097.6557 | 3  | 0 | R.AIALAQATIR.N (Ions score 47)               |
| 667 - 678   | 453.8869  | 1358.6389 | 1358.6327 | 5  | 0 | R.VEHHSDFGPTQR.F (Ions score 23)             |
| 667 - 678   | 453.8869  | 1358.6389 | 1358.6327 | 5  | 0 | R.VEHHSDFGPTQR.F (Ions score 4)              |
| 667 - 678   | 453.8869  | 1358.6389 | 1358.6327 | 5  | 0 | R.VEHHSDFGPTQR.F (Ions score 27)             |
| 667 - 678   | 453.8869  | 1358.6389 | 1358.6327 | 5  | 0 | R.VEHHSDFGPTQR.F (Ions score 29)             |
| 679 - 692   | 709.3596  | 1416.7046 | 1416.6998 | 3  | 0 | R.FGLGNDPSTAPSVR.G (Ions score 85)           |
| 679 - 692   | 709.3596  | 1416.7046 | 1416.6998 | 3  | 0 | R.FGLGNDPSTAPSVR.G (Ions score 81)           |
| 679 - 692   | 709.3596  | 1416.7046 | 1416.6998 | 3  | 0 | R.FGLGNDPSTAPSVR.G (Ions score 65)           |
| 693 - 706   | 755.9500  | 1509.8854 | 1509.8780 | 5  | 0 | R.GPAALPIHLQQLR.G (Ions score 31)            |
| 693 - 706   | 755.9500  | 1509.8854 | 1509.8780 | 5  | 0 | R.GPAALPIHLQQLR.G (Ions score 50)            |
| 693 - 706   | 755.9500  | 1509.8854 | 1509.8780 | 5  | 0 | R.GPAALPIHLQQLR.G (Ions score 43)            |
| 693 - 706   | 755.9500  | 1509.8854 | 1509.8780 | 5  | 0 | R.GPAALPIHLQQLR.G (Ions score 45)            |
| 707 - 712   | 305.6880  | 609.3615  | 609.3598  | 3  | 0 | R.GAPLPR.V (Ions score 32)                   |
| 707 - 712   | 305.6880  | 609.3615  | 609.3598  | 3  | 0 | R.GAPLPR.V (Ions score 22)                   |
| 707 - 712   | 305.6880  | 609.3615  | 609.3598  | 3  | 0 | R.GAPLPR.V (Ions score 22)                   |
| 707 - 712   | 305.6880  | 609.3615  | 609.3598  | 3  | 0 | R.GAPLPR.V (Ions score 22)                   |
| 776 - 785   | 569.8033  | 1137.5921 | 1137.5917 | 0  | 0 | K.TASDLDLYLK.E (Ions score 12)               |
| 776 - 785   | 569.8033  | 1137.5921 | 1137.5917 | 0  | 0 | K.TASDLDLYLK.E (Ions score 36)               |
| 788 - 797   | 538.8050  | 1075.5954 | 1075.5914 | 4  | 0 | R.LTPYDLGGLK.E (Ions score 23)               |
| 788 - 797   | 538.8050  | 1075.5954 | 1075.5914 | 4  | 0 | R.LTPYDLGGLK.E (Ions score 23)               |
| 816 - 823   | 462.2947  | 922.5748  | 922.5712  | 4  | 0 | R.LRPTPIAR.A (Ions score 2)                  |
| 824 - 832   | 497.7607  | 993.5069  | 993.5066  | 0  | 0 | R.AAAGYLICR.V (Ions score 1)                 |
| 889 - 898   | 583.2910  | 1164.5675 | 1164.5597 | 7  | 0 | K.AMFLDEVAR.D (Ions score 28)                |
| 903 - 917   | 849.9750  | 1697.9355 | 1697.9253 | 6  | 0 | R.VWFGLLQASPYLAR.L (Ions score 7)            |
| 903 - 917   | 849.9750  | 1697.9355 | 1697.9253 | 6  | 0 | R.VWFGLLQASPYLAR.L (Ions score 14)           |
| 948 - 957   | 598.8138  | 1195.6130 | 1195.6026 | 9  | 0 | R.WAFYALSNPK.K (Ions score 18)               |
| 990 - 1001  | 616.2973  | 1230.5801 | 1230.5728 | 6  | 0 | R.DTPTGNLAEADK.K (Ions score 16)             |
| 990 - 1001  | 616.2973  | 1230.5801 | 1230.5728 | 6  | 0 | R.DTPTGNLAEADK.K (Ions score 18)             |
| 1004 - 1010 | 358.7212  | 715.4279  | 715.4228  | 7  | 0 | R.NTLGAIK.N (Ions score 22)                  |
| 1011 - 1023 | 783.8613  | 1565.7081 | 1565.7032 | 3  | 0 | K.NDMLAEFFDDLLR.S (Ions score 10)            |
| 1070 - 1078 | 502.2795  | 1002.5445 | 1002.5386 | 6  | 0 | R.EIGSLPYPK.E (Ions score 16)                |
| 1070 - 1078 | 502.2795  | 1002.5445 | 1002.5386 | 6  | 0 | R.EIGSLPYPK.E (Ions score 14)                |
| 1088 - 1098 | 702.3156  | 1402.6167 | 1402.6187 | -1 | 0 | R.AWLECVEDDR.V (Ions score 18)               |
| 1088 - 1098 | 702.3156  | 1402.6167 | 1402.6187 | -1 | 0 | R.AWLECVEDDR.V (Ions score 9)                |
| 1120 - 1127 | 485.2258  | 968.4370  | 968.4386  | -2 | 0 | R.AIYACDTR.S (Ions score 17)                 |
| 1128 - 1141 | 550.2978  | 1647.8716 | 1647.8620 | 6  | 0 | R.SYLAPEHLLATVER.N (Ions score 2)            |
| 1128 - 1141 | 824.9469  | 1647.8792 | 1647.8620 | 10 | 0 | R.SYLAPEHLLATVER.N (Ions score 3)            |
| 1148 - 1154 | 384.7411  | 767.4677  | 767.4654  | 3  | 0 | R.VILNPR.G (Ions score 12)                   |
| 1148 - 1154 | 384.7411  | 767.4677  | 767.4654  | 3  | 0 | R.VILNPR.G (Ions score 26)                   |
| 1219 - 1226 | 476.2435  | 950.4725  | 950.4709  | 2  | 0 | K.QDYLIDGK.F (Ions score 32)                 |
| 1231 - 1240 | 508.7512  | 1015.4879 | 1015.4869 | 1  | 0 | R.SAGTILMSGHR.G (Ions score 10)              |
| 1322 - 1329 | 472.7277  | 943.4408  | 943.4399  | 1  | 0 | R.DSYGYLAR.A (Ions score 31)                 |
| 1322 - 1329 | 472.7277  | 943.4408  | 943.4399  | 1  | 0 | R.DSYGYLAR.A (Ions score 33)                 |
| 1344 - 1359 | 867.4592  | 1732.9039 | 1732.9182 | -8 | 0 | R.VLNFEALTTMVAAR.T (Ions score 2)            |
| 1344 - 1359 | 578.6468  | 1732.9184 | 1732.9182 | 0  | 0 | R.VLNFEALTTMVAAR.T (Ions score 30)           |
| 1367 - 1379 | 655.9098  | 1309.8050 | 1309.7969 | 6  | 0 | R.SNLVPLLGSVAVR.R (Ions score 14)            |
| 1367 - 1379 | 655.9098  | 1309.8050 | 1309.7969 | 6  | 0 | R.SNLVPLLGSVAVR.R (Ions score 45)            |
| 1367 - 1379 | 655.9098  | 1309.8050 | 1309.7969 | 6  | 0 | R.SNLVPLLGSVAVR.R (Ions score 37)            |
| 1416 - 1424 | 479.2872  | 956.5598  | 956.5542  | 6  | 0 | R.AVTVEPTIK.S (Ions score 11)                |
| 1479 - 1486 | 436.7465  | 871.4785  | 871.4763  | 3  | 0 | R.DADLLGLR.F (Ions score 18)                 |
| 1507 - 1516 | 515.3055  | 1028.5964 | 1028.5978 | -1 | 1 | K.TRAPSGVLTK.Y (Ions score 9)                |
| 1509 - 1516 | 386.7306  | 771.4467  | 771.4491  | -3 |   |                                              |



Figure S3

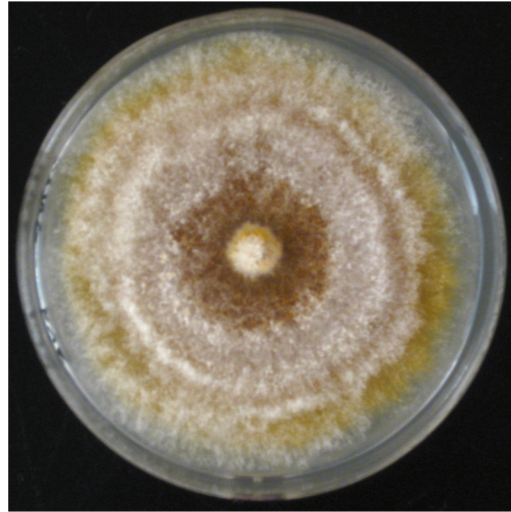

EP155/VF

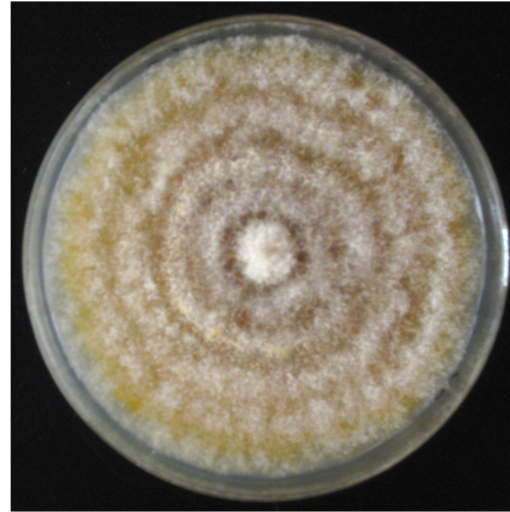

EP155/AalVV1

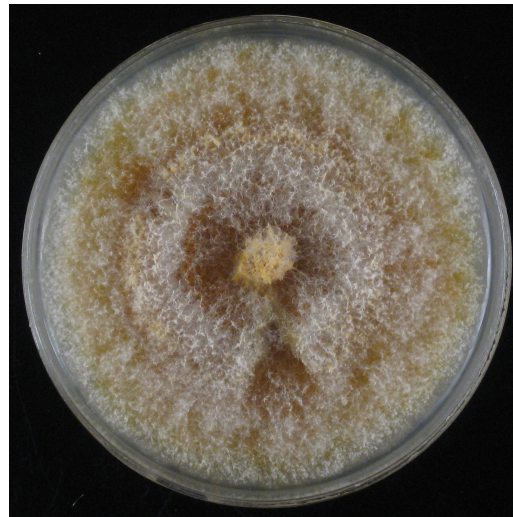

$\Delta dcl2$ /VF

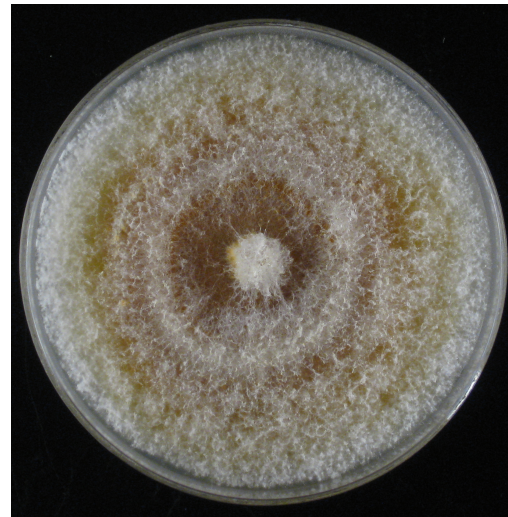

$\Delta dcl2$ /AalVV1

# Figure S4

Phomopsis vexans RNA virus KP090346

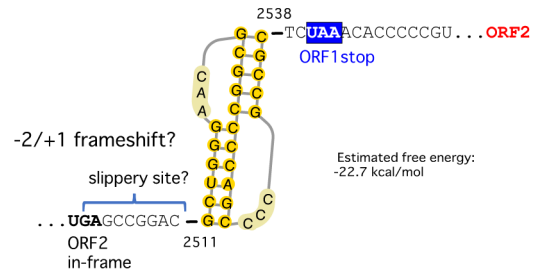

Nigrospora oryzae victorivirus 1 KT428155

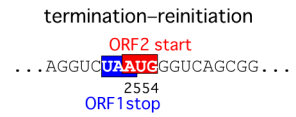

Supplement: viruses-11-00577-s001.pdf [file viruses-11-00577-s001.pdf]
